# Supplementary material
Source: Springer Nature journal article supplement (https://www.springermedizin.de/resource/supplementary/12891_2006_301_MOESM1_ESM.pdf/9511002)
Supplement: MOESM1 [file 9511002]

Invitations for novice runners to participate in the GRONORUN trial  
in local media

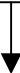

Requests for participation and were available for inclusion  
(N=603)

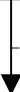

*23 did not react on invitation*

Appointment for baseline measurements  
(N=580)

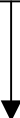

*25 failed to attend baseline measurements*

Baseline measurements  
(N=555)

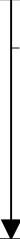

*23 were excluded:  
8 were not novice runners  
13 were injured (<3 months) at baseline  
2 had contraindications for vigorous physical activity*

Randomization  
Stratified by injury history, gender and sporting activities  
(N=532)

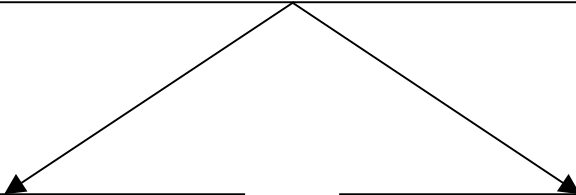

Allocated to intervention group  
(N=264)

Allocated to control group  
(N=268)
